# Supplementary material
Source: publisher figshare collection journal article supplement (https://sage.figshare.com/ndownloader/files/17905247)
Supplement: Supplementary file 1 [file 17905247]

**Supplemental Digital Appendix 3. Bivariate cumulative logistic regression models to assess effect of domain completeness on the directional change in response between pre- and post- assessment questions (outcome), adjusting for the number of previous NIs.**

| Question                                                                                                                                                                    | Predictor                        | p             | p<br>(Number of<br>Previous NIs) |
|-----------------------------------------------------------------------------------------------------------------------------------------------------------------------------|----------------------------------|---------------|----------------------------------|
| 1. To what extent does your institution gather and disseminate data on race, ethnicity and language preference of the population you serve?                                 | Pre-work/Background              | 0.9333        | 0.1188                           |
|                                                                                                                                                                             | Measurement                      | 0.2896        | 0.1714                           |
|                                                                                                                                                                             | Methods                          | <b>0.0146</b> | 0.0629                           |
|                                                                                                                                                                             | Implement-Measure-Adjust-Sustain | 0.4912        | 0.1318                           |
| 2. How proficient is your institution at engaging residents in the use of data as research tool to reduce health care disparities?                                          | Pre-work/Background              | 0.9250        | 0.3865                           |
|                                                                                                                                                                             | Measurement                      | 0.8509        | 0.3774                           |
|                                                                                                                                                                             | Methods                          | 0.3255        | 0.3814                           |
|                                                                                                                                                                             | Implement-Measure-Adjust-Sustain | 0.1968        | 0.5159                           |
| 3. How proficient is your institution at engaging residents in community research regarding health care disparities as a scholarly activity?                                | Pre-work/Background              | 0.9300        | 0.1347                           |
|                                                                                                                                                                             | Measurement                      | 0.8646        | 0.1433                           |
|                                                                                                                                                                             | Methods                          | 0.4300        | 0.1403                           |
|                                                                                                                                                                             | Implement-Measure-Adjust-Sustain | 0.0870        | 0.1358                           |
| 4. To what extent do your residents receive cultural competency education on identifying and reducing health care disparities relevant to the patient population you serve? | Pre-work/Background              | 0.3621        | 0.3971                           |
|                                                                                                                                                                             | Measurement                      | 0.2844        | 0.5162                           |
|                                                                                                                                                                             | Methods                          | 0.3507        | 0.4398                           |
|                                                                                                                                                                             | Implement-Measure-Adjust-Sustain | 0.2051        | 0.4928                           |
| 5. To what extent do your residents understand principles of cultural competency and delivery of linguistically appropriate services?                                       | Pre-work/Background              | 0.8406        | 0.1479                           |
|                                                                                                                                                                             | Measurement                      | 0.1389        | 0.2048                           |
|                                                                                                                                                                             | Methods                          | <b>0.0307</b> | 0.0855                           |
|                                                                                                                                                                             | Implement-Measure-Adjust-Sustain | 0.2943        | 0.1615                           |
| 6. At what level is your average resident trained and given the opportunity to understand the community health needs of the population you serve?                           | Pre-work/Background              | 0.8416        | 0.3905                           |
|                                                                                                                                                                             | Measurement                      | 0.2622        | 0.4853                           |
|                                                                                                                                                                             | Methods                          | 0.0680        | 0.3401                           |
|                                                                                                                                                                             | Implement-Measure-Adjust-Sustain | -             | -                                |
| 7. To what extent do your residents and faculty members know your institution's priorities for addressing health care disparities?                                          | Pre-work/Background              | 0.3908        | 0.5187                           |
|                                                                                                                                                                             | Measurement                      | 0.6258        | 0.5880                           |
|                                                                                                                                                                             | Methods                          | 0.1094        | 0.6026                           |
|                                                                                                                                                                             | Implement-Measure-Adjust-Sustain | 0.1925        | 0.6150                           |
| 8. How active are your residents in participating in community health improvement strategies?                                                                               | Pre-work/Background              | 0.1935        | 0.1231                           |
|                                                                                                                                                                             | Measurement                      | 0.9953        | 0.1909                           |
|                                                                                                                                                                             | Methods                          | 0.9654        | 0.1847                           |
|                                                                                                                                                                             | Implement-Measure-Adjust-Sustain | 0.5613        | 0.2186                           |
| 9. How active is your institution in engaging the various communities it serves in health improvement?                                                                      | Pre-work/Background              | 0.2294        | 0.6017                           |
|                                                                                                                                                                             | Measurement                      | 0.3035        | 0.4286                           |
|                                                                                                                                                                             | Methods                          | 0.4966        | 0.5225                           |
|                                                                                                                                                                             | Implement-Measure-Adjust-Sustain | 0.6631        | 0.4970                           |
| <b>Readiness</b><br>Check one, regarding your institution's overall readiness [or current state of activities] in Community and Health Disparities.                         | Pre-work/Background              | 0.5200        | <b>0.0227</b>                    |
|                                                                                                                                                                             | Measurement                      | 0.4423        | <b>0.0213</b>                    |
|                                                                                                                                                                             | Methods                          | 0.7957        | <b>0.0222</b>                    |
|                                                                                                                                                                             | Implement-Measure-Adjust-Sustain | 0.8221        | <b>0.0226</b>                    |
